# Supplementary material
Source: publisher figshare collection journal article supplement (https://gsajournals.figshare.com/ndownloader/files/17710700)
Supplement: Supplementary file 1 [file 17710700]

~~
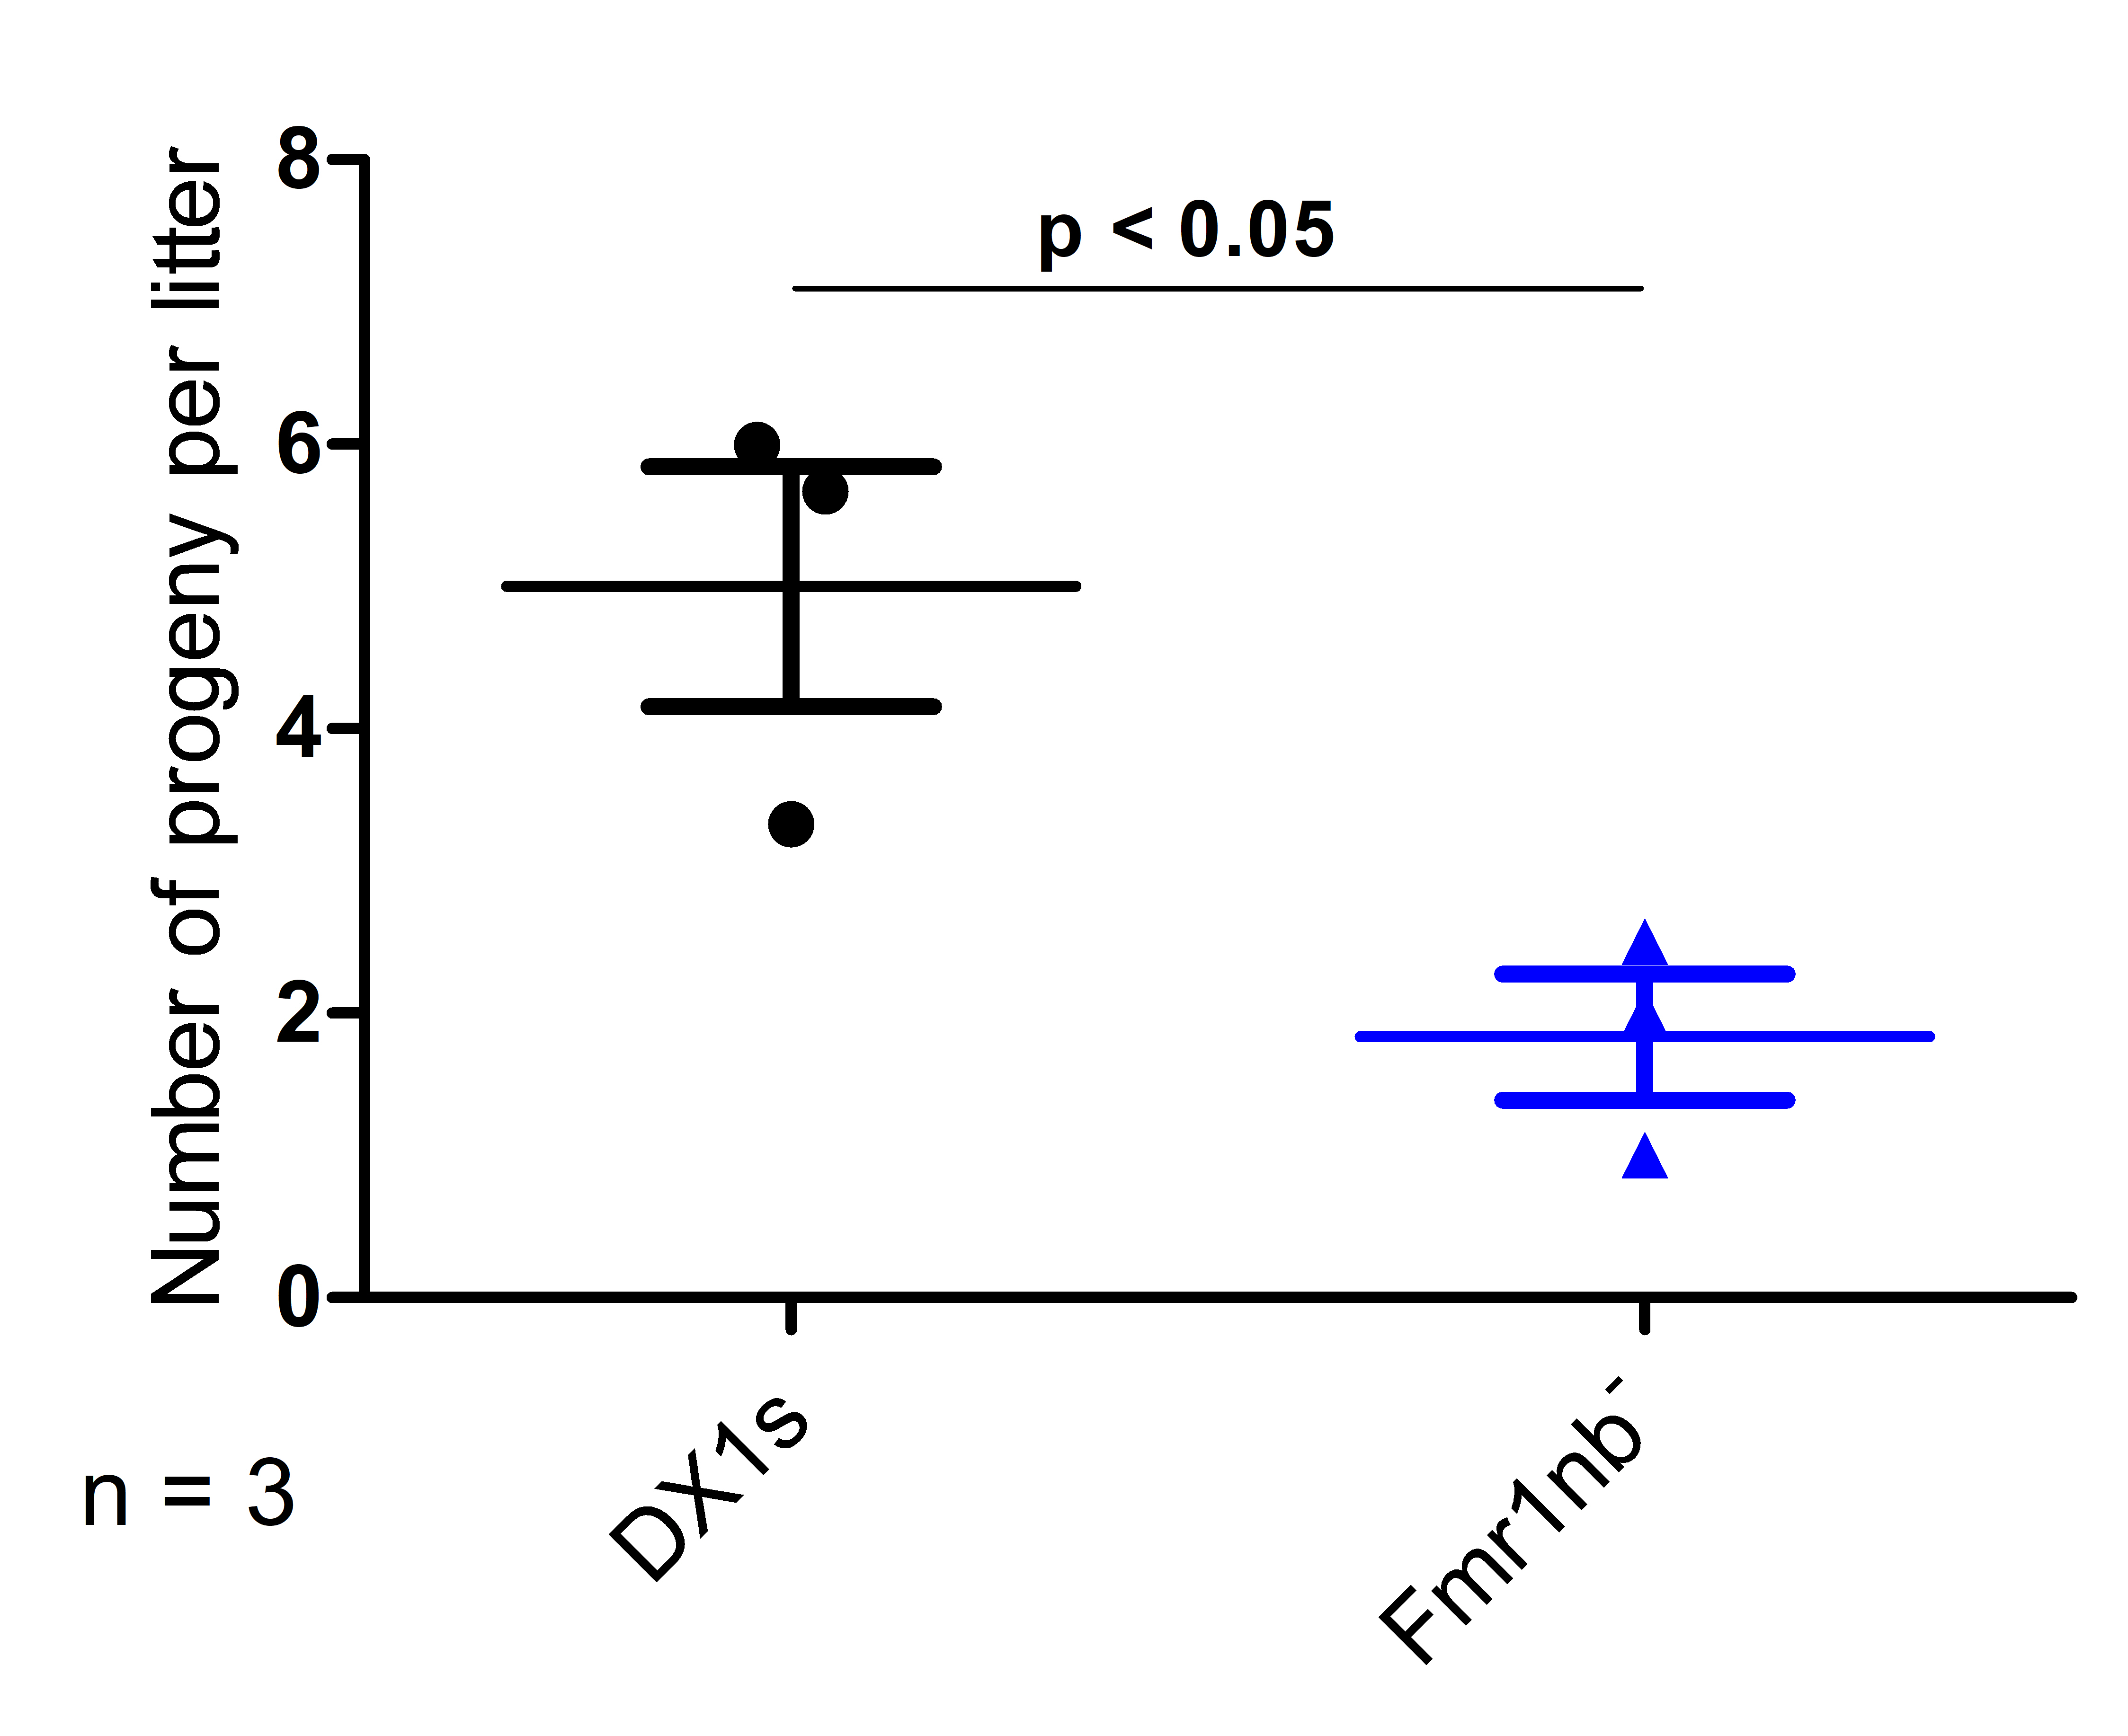
~~

**Figure S4 Reproductive performance of B6.DX1s and B6.DX1s.*Fmr1nb*- males.** Mean values (± SD) of litter size sired by B6.DX.1s or B6.DX.1s.*Fmr1nb-* males (p < 0.05, t-test). The number of sired offspring was counted per each male caged individually with B6 female for three months of mating period.
